# Supplementary material
Source: Elsevier journal article supplement (https://www.sciencedirect.com/science/article/pii/S0300893224002732)

Supplementary data

Figure 1 of the supplementary data.

Hazard ratio for the risk of cardiovascular mortality across the continuum of UNa<sup>+</sup> in the multivariable model. CV: cardiovascular; UNa<sup>+</sup>: urinary sodium

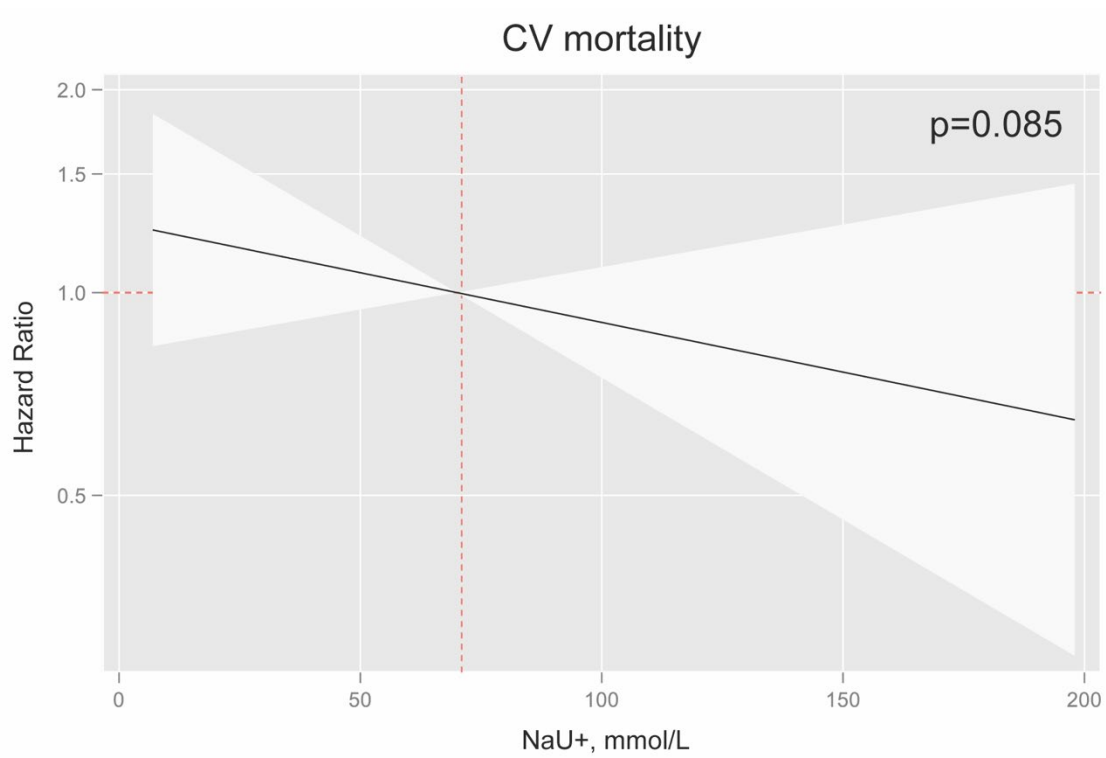

Figure 2 of the supplementary data

Kaplan-Meier curves for time to first WHF event during first year of follow-up.

Q: quartile; UNa+: urinary sodium; WHF: worsening heart failure

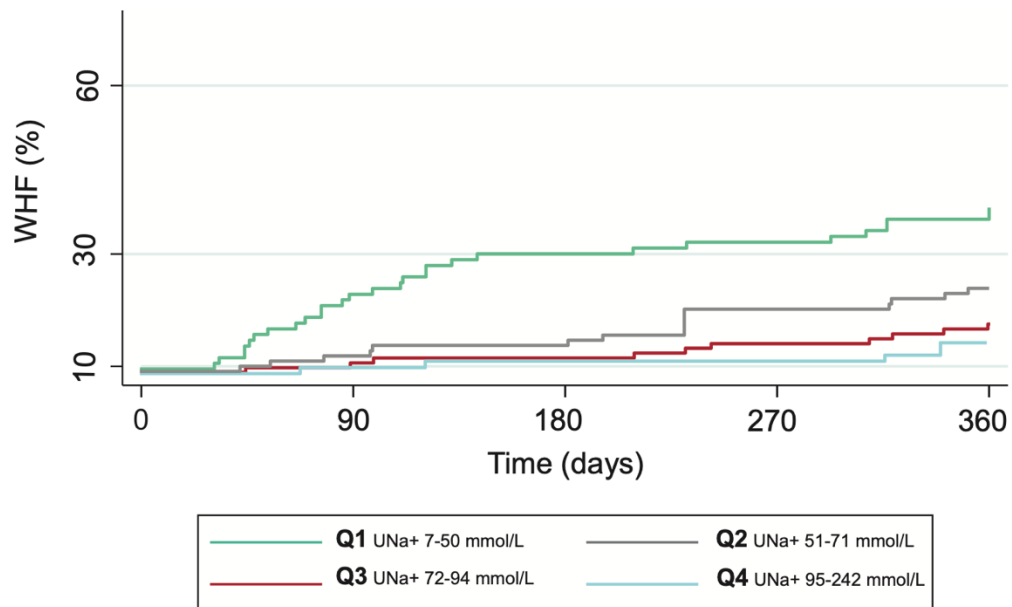

Figure 3 of the supplementary data

Hazard ratio for the risk of WHF event during first year of follow-up across the continuum of UNa+ in the multivariable model.

UNa+: urinary sodium; WHF: worsening heart failure

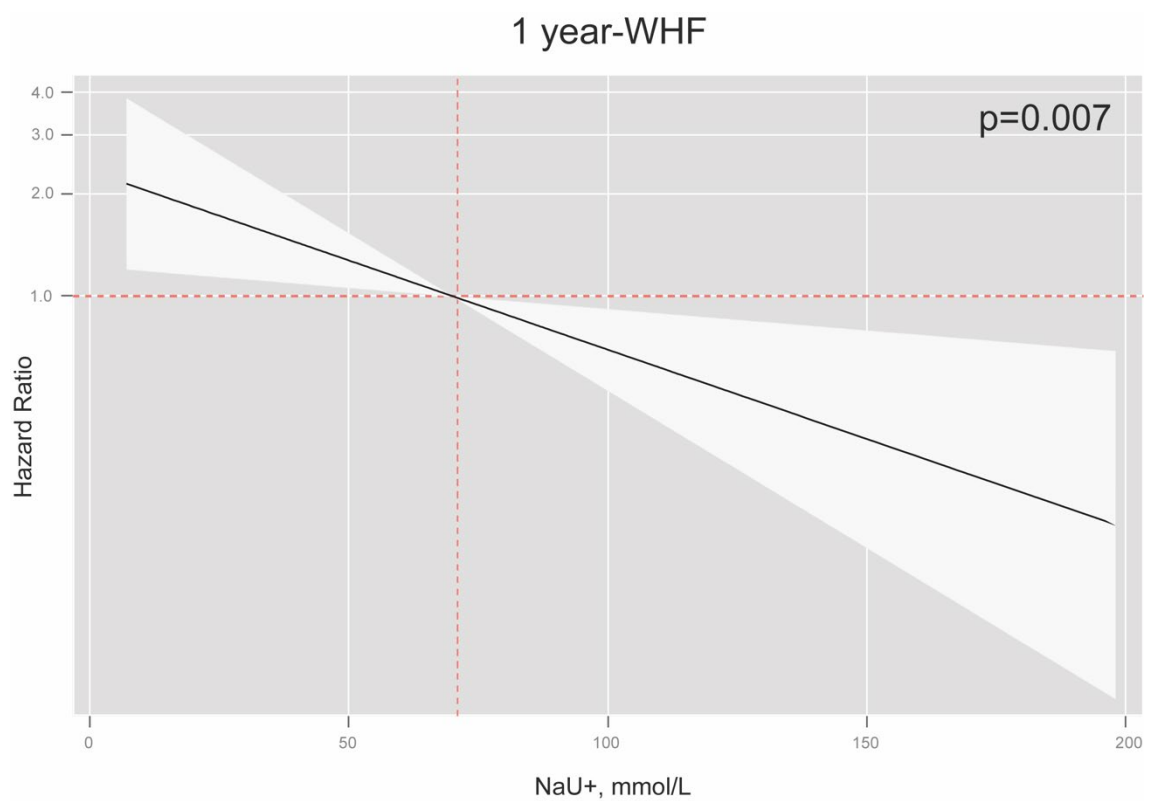

Supplement: mmc1 [file mmc1.pdf]
